# Supplementary material for: How zebrafish turn: analysis of pressure force dynamics and mechanical work
Source: Oxford University Press journal article supplement (doi:10.1242/jeb.223230), 2020-01-01
Supplement: jeb223230supp.pdf [file jeb223230supp.pdf]

Table S1: Body length, mass and total surface area of the individual animals investigated (\* = computed based on McHenry and Lauder, 2006, CI: 95% confidence intervals)

| Individual | Body length [mm] | Mass* [mg] | Mass CI* [mg]  | Total surface area [mm <sup>2</sup> ] | Model total surface area*[mm <sup>2</sup> ] | Model total surface area CI*[mm <sup>2</sup> ] |
|------------|------------------|------------|----------------|---------------------------------------|---------------------------------------------|------------------------------------------------|
| 1          | 24.04            | 46.79      | [34.85, 64.67] | 200.85                                | 176.77                                      | [152.57, 210.93]                               |
| 2          | 21.65            | 32.24      | [24.30, 43.99] | 171.32                                | 137.15                                      | [119.09,162.51]                                |
| 3          | 24.66            | 48.67      | [36.24, 67.42] | 220.07                                | 181.61                                      | [156.73,216.97]                                |
| 4          | 19.35            | 23.52      | [17.90, 31.73] | 127.66                                | 110.61                                      | [96.52,130.28]                                 |

Table S2: Flow and pressure characteristics (mean±s. d) for N=18 experiments

| Turning type       | Turning angle [°] | COM displacement [mm] | Maximum fluid speed [ $\frac{cm}{s}$ ] | Minimum pressure [Pa] | Maximum pressure [Pa] | N  |
|--------------------|-------------------|-----------------------|----------------------------------------|-----------------------|-----------------------|----|
| Small angle (<70°) | 21.19±7.68        | 5.21±1.01             | 3.91±0.65                              | -1.49±0.47            | 1.46±0.46             | 16 |
| Large angle (>70°) | 72.91±2.22        | 7.66±0.77             | 6.65±1.17                              | -2.34±0.04            | 2.37±0.12             | 2  |

Table S3: Summary of turning characteristics for N=18 turning maneuvers  
(CI: 95% confidence interval, resulting from mass computation in McHenry and Lauder 2006)

| #  | Turning angle [°] | Duration [s] | COM displacement [mm] | Re  | Net work [ $\mu$ J] | Negative work [%] | TC [ $\frac{mJ}{kgs}$ ] (positive work) | TC [ $\frac{mJ}{kgs}$ ] (total work) | TC CI [ $\frac{mJ}{kgs}$ ] (total work) |
|----|-------------------|--------------|-----------------------|-----|---------------------|-------------------|-----------------------------------------|--------------------------------------|-----------------------------------------|
| 1  | 29.6              | 0.330        | 6.62                  | 483 | 0.069               | 15.36             | 5.44                                    | 6.42                                 | [4.65, 8.62]                            |
| 2  | 15.7              | 0.225        | 5.24                  | 560 | 0.083               | 14.09             | 9.46                                    | 11.01                                | [7.96, 14.78]                           |
| 3  | 15.6              | 0.140        | 4.32                  | 668 | 0.133               | 11.95             | 34.14                                   | 38.77                                | [28.41, 51.44]                          |
| 4  | 25.6              | 0.175        | 5.11                  | 632 | 0.109               | 13.65             | 23.04                                   | 26.68                                | [19.55, 35.40]                          |
| 5  | 24.8              | 0.200        | 5.12                  | 554 | 0.084               | 17.32             | 16.51                                   | 19.96                                | [14.63, 26.49]                          |
| 6  | 27.9              | 0.250        | 5.86                  | 508 | 0.082               | 15.43             | 12.37                                   | 14.63                                | [10.72, 19.41]                          |
| 7  | 71.3              | 0.191        | 8.20                  | 930 | 0.278               | 11.49             | 51.87                                   | 58.60                                | [42.95, 77.75]                          |
| 8  | 19.0              | 0.125        | 5.42                  | 939 | 0.170               | 12.26             | 49.11                                   | 55.98                                | [41.03, 74.27]                          |
| 9  | 30.2              | 0.180        | 6.47                  | 779 | 0.139               | 11.86             | 27.70                                   | 31.43                                | [23.03, 41.70]                          |
| 10 | 27.6              | 0.160        | 5.50                  | 744 | 0.093               | 14.07             | 21.55                                   | 25.07                                | [18.38, 33.27]                          |
| 11 | 32.8              | 0.175        | 5.97                  | 739 | 0.152               | 12.14             | 31.33                                   | 35.66                                | [26.13, 47.31]                          |
| 12 | 15.7              | 0.170        | 5.11                  | 651 | 0.100               | 12.89             | 21.41                                   | 24.58                                | [18.01, 32.61]                          |
| 13 | 15.1              | 0.171        | 4.69                  | 594 | 0.082               | 16.33             | 18.42                                   | 22.02                                | [16.14, 29.21]                          |
| 14 | 18.7              | 0.255        | 4.55                  | 440 | 0.118               | 14.52             | 11.46                                   | 13.40                                | [9.68, 18.00]                           |
| 15 | 3.0               | 0.230        | 2.42                  | 259 | 0.034               | 20.13             | 4.09                                    | 5.13                                 | [3.70, 6.88]                            |
| 16 | 19.2              | 0.126        | 6.21                  | 953 | 0.139               | 10.75             | 53.40                                   | 59.83                                | [44.35, 78.62]                          |
| 17 | 74.5              | 0.150        | 7.12                  | 918 | 0.196               | 11.09             | 63.44                                   | 71.35                                | [52.89, 93.75]                          |
| 18 | 18.7              | 0.135        | 4.68                  | 671 | 0.072               | 11.22             | 25.82                                   | 29.08                                | [21.56, 38.21]                          |
